# Supplementary material for: Preparation of Co–N–C supported on silica spheres with high catalytic performance for ethylbenzene oxidation
Source: Royal Society of Chemistry journal article supplement (doi:10.1039/c4ra09269d), 2014-12-17
Supplement: c4ra09269d1.pdf [file c4ra09269d1.pdf]

## Supporting Information

### Preparation of Co-N-C supported on silica spheres with high catalytic performance for ethylbenzene oxidation

Zhigang Liu,<sup>a,\*</sup> Lintao Ji,<sup>a</sup> Xulong Dong,<sup>a</sup> Zhen Li,<sup>b</sup> Lingling Fu,<sup>a</sup> Qiuan Wang<sup>a</sup>

<sup>a</sup> School of chemistry and chemical engineering, Hunan University, Changsha, Hunan, 410082, China

<sup>b</sup> Australian Institute of Innovative Materials, University of Wollongong, Innovation Campus, North Wollongong, NSW 2500, Australia

Structural and morphological characterizations of Co-N-C/SN are conducted with FEI G<sup>2</sup> 80-200 operated at 200 kV in STEM mode. According to the STEM images as shown in Figure S1, it is easy to find that Co is decorated on the surface of the silica.

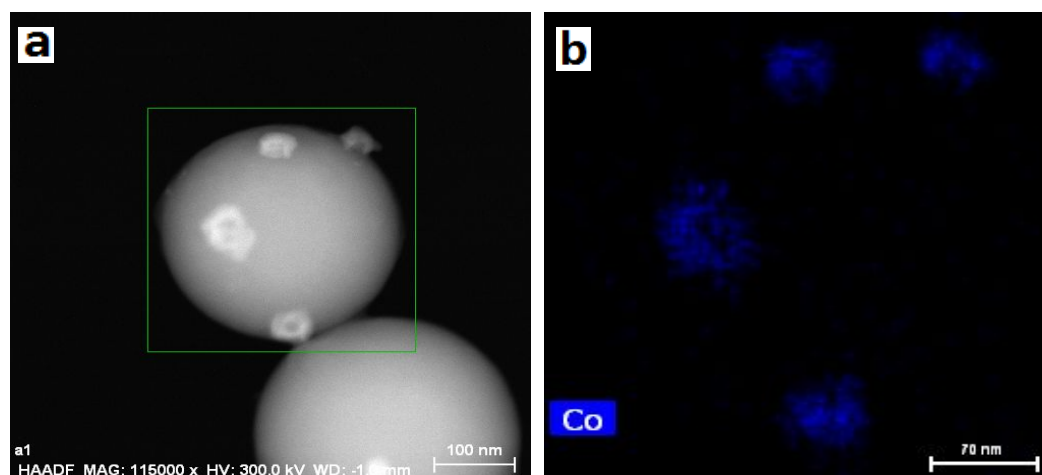

Figure S1 STEM elemental mapping of Co-N-C/SN: (a) HAADF image, (b) Co.
